# Supplementary material for: Experimentally Determined Long Intrinsically Disordered Protein Regions Are Now Abundant in the Protein Data Bank
Source: MDPI journal article supplement (doi:10.3390/ijms21124496), 2020-06-24
Supplement: s1 [file s1]

# Experimentally determined long intrinsically disordered protein regions are now abundant in the Protein Data Bank

Alexander Miguel Monzon<sup>1,\*</sup>, Marco Necci<sup>1,\*</sup>, Federica Quaglia<sup>1</sup>, Ian Walsh<sup>2</sup>, Giuseppe Zanotti<sup>1</sup>, Damiano Piovesan<sup>1,°</sup> and Silvio C. E. Tosatto<sup>1,°</sup>

<sup>1</sup>Department of Biomedical Sciences, University of Padua, Padua, Italy

<sup>2</sup>Bioprocessing Technology Institute, A\*STAR, Singapore

\*These authors contributed equally to this work

°Co-corresponding authors

°Corresponding authors: [damiano.piovesan@unipd.it](mailto:damiano.piovesan@unipd.it) and [silvio.tosatto@unipd.it](mailto:silvio.tosatto@unipd.it)

## Supplementary Material

## Supplementary Figures

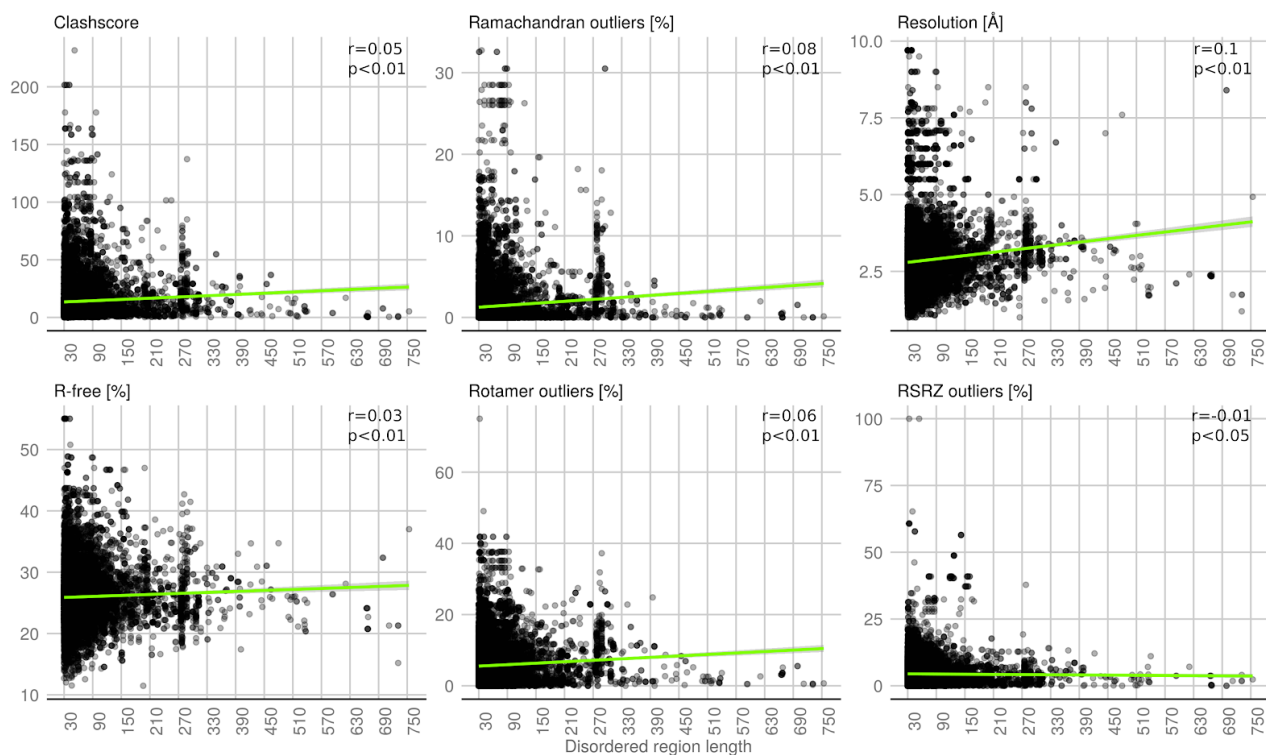

**Figure S1: Scatter plots of different structure quality metrics and disordered region length.** On the X-axis the disordered region length, calculated for each PDB chain with LDRs (at least 30 residues length). On Y-axes the different quality metrics corresponding specified on the title of each subplot. Pearson's correlation coefficients (r) and P-values (p) are shown for each subplot.

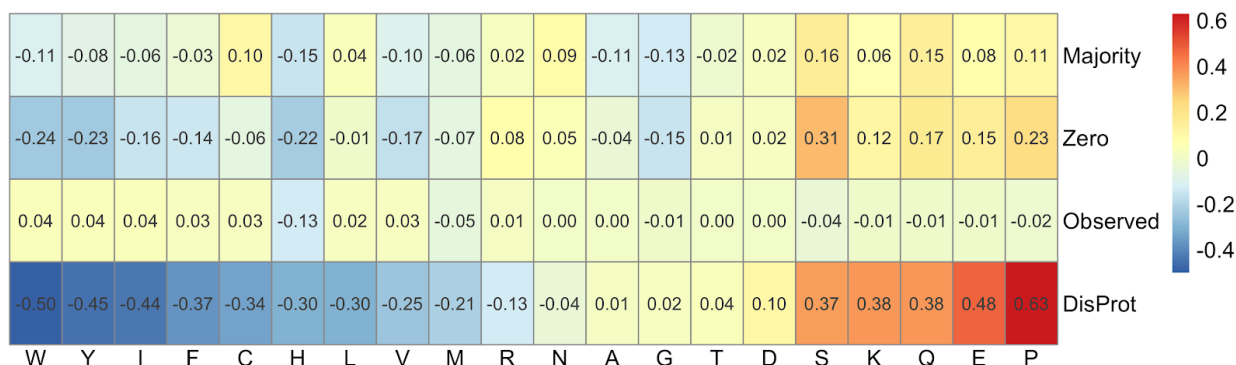

**Figure S2: Heatmap of amino acid composition enrichment.** Each cell represents the fold increase (red) or decrease (blue) compared to the PDB SEQRES amino acid distribution. Majority and Zero represent the LDRs amino acid frequency distribution for each consensus rule. Observed is the amino acid frequency distribution of all structured residues in the PDB. The amino acids are ordered by DisProt enrichment values (baseline composition distribution of disordered proteins).

## Supplementary Tables

| UniprotID  | Region start position | Region end position | Final Decision | DisProt accession (release: 2020_05) |
|------------|-----------------------|---------------------|----------------|--------------------------------------|
| O60494     | 1389                  | 3623                | NO MENTION     | -                                    |
| Q9BE39     | 807                   | 1935                | NO MENTION     | DP02522                              |
| O60494     | 121                   | 931                 | NO MENTION     | -                                    |
| B2HN69     | 1                     | 731                 | NO MENTION     | -                                    |
| G0S3L5     | 1                     | 699                 | DISORDERED     | DP02520                              |
| E5XP76     | 1                     | 667                 | NO MENTION     | -                                    |
| P20676     | 332                   | 973                 | DISORDERED     | DP01075                              |
| Q6RKB1     | 640                   | 1174                | NO MENTION     | -                                    |
| A5HC98     | 1746                  | 2263                | DISORDERED     | DP02521                              |
| Q08345     | 1                     | 505                 | NO MENTION     | -                                    |
| Q01101     | 10                    | 510                 | NO MENTION     | DP01023                              |
| P46674     | 806                   | 1301                | DISORDERED     | DP02481                              |
| O60563     | 262                   | 726                 | NO MENTION     | -                                    |
| P35637     | 60                    | 507                 | DISORDERED     | DP01102                              |
| Q8ZRP0     | 1                     | 422                 | DISORDERED     | DP02483                              |
| Q5A3P6     | 524                   | 944                 | DISORDERED     | DP02500                              |
| P32504     | 538                   | 956                 | DISORDERED     | DP02033                              |
| A5YV76     | 2115                  | 2512                | DISORDERED     | DP01026                              |
| Q9TY14     | 1                     | 378                 | DISORDERED     | DP00749                              |
| A0A0J9X1Q5 | 1                     | 371                 | DISORDERED     | DP00913                              |
| Q86U44     | 1                     | 367                 | NO MENTION     | -                                    |
| P02671     | 220                   | 581                 | DISORDERED     | DP02130                              |
| Q9NYB9     | 156                   | 513                 | DISORDERED     | DP02386                              |
| Q01970     | 883                   | 1234                | DISORDERED     | DP02477                              |
| P0DOC6     | 1                     | 349                 | NO MENTION     | -                                    |
| Q9BIM8     | 1                     | 342                 | DISORDERED     | DP02877                              |
| Q13740     | 246                   | 583                 | DISORDERED     | DP02515                              |
| O75533     | 1                     | 333                 | DISORDERED     | DP01863                              |
| P08240     | 1                     | 331                 | DISORDERED     | DP00893                              |
| P20676     | 1                     | 326                 | DISORDERED     | DP01075                              |
| Q13888     | 1                     | 325                 | NO MENTION     | -                                    |
| Q5HLM5     | 1                     | 312                 | NO MENTION     | -                                    |
| Q92558     | 185                   | 494                 | DISORDERED     | DP02529                              |

|           |      |      |            |         |
|-----------|------|------|------------|---------|
| Q9UKL0    | 4    | 310  | DISORDERED | DP02523 |
| Q01080    | 116  | 415  | DISORDERED | DP02519 |
| P18564    | 492  | 788  | DISORDERED | DP02530 |
| C4R4Y0    | 1454 | 1743 | DISORDERED | DP02526 |
| P22473    | 1    | 288  | DISORDERED | DP02487 |
| P12537    | 304  | 585  | DISORDERED | DP02508 |
| Q84852    | 17   | 298  | DISORDERED | DP02507 |
| P04050    | 1456 | 1623 | DISORDERED | DP02527 |
| Q80UG2    | 952  | 1229 | DISORDERED | DP02528 |
| P15825    | 74   | 348  | DISORDERED | DP02536 |
| P14448    | 237  | 505  | DISORDERED | DP00233 |
| Q86UE8    | 191  | 455  | DISORDERED | DP02475 |
| O53168    | 1    | 264  | DISORDERED | DP02505 |
| Q676U5    | 49   | 307  | DISORDERED | DP02148 |
| P11961    | 170  | 428  | NO MENTION | -       |
| P08621    | 181  | 437  | DISORDERED | DP02171 |
| P54652    | 386  | 639  | NO MENTION | -       |
| P09327    | 360  | 613  | DISORDERED | DP02510 |
| P46674    | 1    | 252  | DISORDERED | DP02481 |
| P35828    | 1    | 248  | DISORDERED | DP02504 |
| Q28146    | 31   | 277  | DISORDERED | DP02503 |
| Q64487-12 | 1019 | 1265 | DISORDERED | DP02517 |
| E6YFW2    | 313  | 558  | NO MENTION | -       |
| Q05022    | 1163 | 1407 | DISORDERED | DP02513 |
| P0AD27    | 1    | 245  | NO MENTION | DP02484 |
| P40709    | 1    | 242  | NO MENTION | DP02485 |
| A0R1T8    | 1    | 239  | DISORDERED | DP02502 |
| A5YKK6    | 1605 | 1841 | DISORDERED | DP02524 |
| P56287    | 444  | 678  | DISORDERED | DP02516 |
| Q06696    | 162  | 395  | DISORDERED | DP01611 |
| Q8A6W3    | 1    | 234  | DISORDERED | DP02506 |
| P00800    | 1    | 232  | DISORDERED | DP02501 |
| Q5A3P6    | 1    | 232  | DISORDERED | DP02500 |
| P36106    | 1    | 231  | DISORDERED | DP02476 |
| A0KJC7    | 1    | 230  | DISORDERED | DP02499 |
| P36106    | 366  | 594  | DISORDERED | DP02476 |
| P50616    | 117  | 345  | DISORDERED | DP00794 |
| S6B291    | 238  | 465  | NO MENTION | -       |
| A7YK37    | 1    | 227  | DISORDERED | DP02498 |
| P36594    | 1509 | 1735 | DISORDERED | DP02514 |

|        |      |      |            |                        |
|--------|------|------|------------|------------------------|
| P05844 | 735  | 960  | DISORDERED | DP02497                |
| Q8ZRW0 | 1    | 225  | DISORDERED | DP02518                |
| O60502 | 696  | 916  | DISORDERED | DP02479                |
| O70038 | 116  | 336  | NO MENTION | -                      |
| P56926 | 633  | 852  | DISORDERED | DP02496                |
| P15311 | 298  | 515  | DISORDERED | DP00775                |
| Q928V6 | 133  | 349  | DISORDERED | DP02495                |
| Q9BJX6 | 1    | 217  | DISORDERED | DP00800                |
| O56139 | 1    | 216  | DISORDERED | DP02494                |
| P21401 | 154  | 369  | DISORDERED | DP02493                |
| Q808Y3 | 1    | 216  | DISORDERED | DP02492                |
| Q9WBP8 | 1    | 216  | DISORDERED | DP02491                |
| Q9Z4P9 | 375  | 589  | NO MENTION | -                      |
| D1A4G7 | 200  | 413  | DISORDERED | DP02490                |
| Q9P2K3 | 1    | 214  | DISORDERED | (isoform 3)<br>DP02408 |
| B4Y891 | 1    | 213  | DISORDERED | DP01984                |
| Q9YIJ1 | 1    | 208  | DISORDERED | DP02489                |
| O28769 | 30   | 236  | DISORDERED | DP02488                |
| P9WGI1 | 1    | 206  | DISORDERED | DP02525                |
| P22473 | 301  | 506  | DISORDERED | DP02487                |
| H0W0T5 | 362  | 565  | DISORDERED | DP00870                |
| Q12102 | 423  | 625  | DISORDERED | DP02480                |
| A7ZUK2 | 932  | 1134 | DISORDERED | DP02486                |
| P0A8T7 | 932  | 1134 | NO MENTION | -                      |
| Q8NCM8 | 1054 | 1254 | NO MENTION | -                      |
| Q6SJQ7 | 138  | 337  | DISORDERED | DP02478                |

**Table S1: Manually curated longest LDR.** Uniprot accession number, region start and end positions, final curator decision and DisProt accession code. No mention means that no evidence was found to relate the presence of missing residues with intrinsic disorder.

|                     | MCC          | F1 score     | Accuracy     | Precision    | Specificity  | Recall       |
|---------------------|--------------|--------------|--------------|--------------|--------------|--------------|
| <b>Espritz-X</b>    | <b>0.461</b> | <b>0.508</b> | 0.679        | 0.717        | <b>0.965</b> | 0.393        |
| <b>VSL2b</b>        | <u>0.413</u> | 0.479        | 0.668        | <b>0.635</b> | 0.95         | <b>0.385</b> |
| <b>Espritz-N</b>    | 0.399        | 0.368        | 0.613        | <b>0.852</b> | <b>0.991</b> | 0.235        |
| <b>IUPred-short</b> | 0.379        | <u>0.506</u> | <b>0.722</b> | 0.414        | 0.794        | <b>0.65</b>  |
| <b>IUPred-long</b>  | 0.379        | 0.463        | 0.662        | 0.571        | 0.935        | 0.389        |
| <b>DisEMBL-465</b>  | 0.363        | 0.419        | 0.636        | 0.621        | 0.957        | 0.316        |
| <b>DisEMBL-HL</b>   | 0.361        | 0.483        | <u>0.687</u> | 0.461        | 0.867        | <u>0.507</u> |
| <b>MobiDB-Lite</b>  | 0.266        | <b>0.225</b> | <b>0.561</b> | <u>0.738</u> | <u>0.989</u> | 0.133        |
| <b>GlobPlot</b>     | 0.203        | 0.377        | 0.621        | 0.301        | 0.738        | 0.503        |
| <b>Espritz-D</b>    | 0.193        | 0.329        | 0.591        | 0.356        | 0.877        | 0.305        |

**Table S2: Disorder prediction evaluation on LDR proteins using the “zero” consensus.** Methods are sorted based on MCC. In bold the best value and underlined the second best for each measure.

|              | MCC          | F1 score     | Accuracy     | Precision    | Specificity  | Recall       |
|--------------|--------------|--------------|--------------|--------------|--------------|--------------|
| Espritz-X    | <b>0.391</b> | <u>0.428</u> | 0.643        | <u>0.653</u> | 0.968        | 0.318        |
| IUPred-short | <u>0.363</u> | 0.418        | 0.641        | 0.587        | 0.957        | 0.324        |
| VSL2b        | 0.34         | <b>0.458</b> | <b>0.703</b> | 0.37         | 0.806        | <b>0.6</b>   |
| DisEMBL-465  | 0.328        | 0.379        | 0.622        | 0.565        | 0.959        | 0.285        |
| MobiDB-Lite  | 0.325        | 0.269        | 0.577        | <b>0.823</b> | <b>0.993</b> | 0.161        |
| IUPred-long  | 0.312        | 0.378        | 0.623        | 0.52         | 0.948        | 0.297        |
| Espritz-N    | 0.296        | 0.412        | <u>0.653</u> | 0.397        | 0.877        | 0.429        |
| Espritz-D    | 0.212        | 0.177        | 0.546        | 0.636        | <u>0.989</u> | 0.103        |
| DisEMBL-HL   | 0.207        | 0.359        | 0.63         | 0.274        | 0.74         | <u>0.519</u> |
| GlobPlot     | 0.147        | 0.272        | 0.569        | 0.295        | 0.886        | 0.252        |

**Table S3: Disorder prediction evaluation on LDR proteins subset (“majority” - “zero” consensus).** Methods are sorted based on MCC. In bold the best value and underlined the second best for each measure.

## Supplementary Data

**Dataset S1:** Semicolon separated file with all missing residue regions for all PDB and chains in the dataset.

**Dataset S2:** Semicolon separated file with all “majority” consensus regions in the dataset.

**Dataset S3:** Semicolon separated file with all “zero” consensus regions in the dataset.
